# Supplementary material for: Bioinformatics analysis of SARS-CoV-2 RBD mutant variants and insights into antibody and ACE2 receptor binding
Source: bioRxiv or medRxiv preprint supplement (doi:10.1101/2021.04.03.438113), 2021-04-26
Supplement: Supplementary file [file media-1.pdf]

# Supplementary File1

Molecular interactions of antibody CR3022 with 7 different structurally changed RBD variants. Hydrogen bonds are depicted in green dashed lines and hydrophobic contacts are indicated by the red brick.

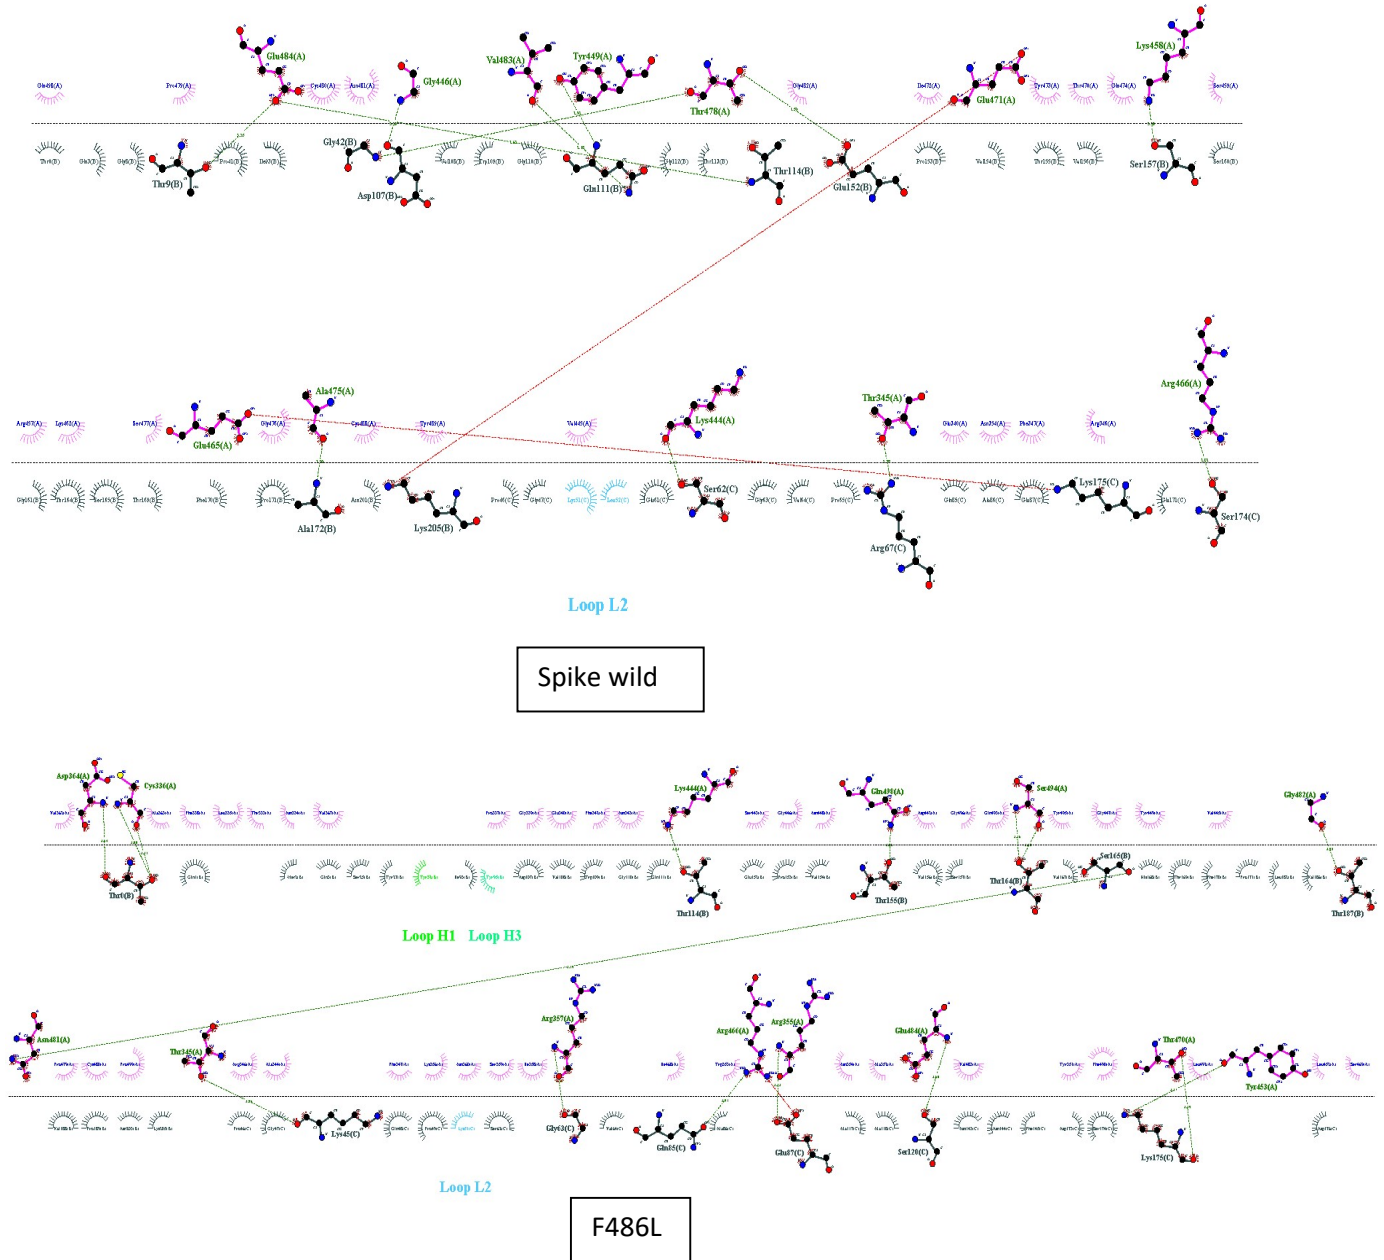

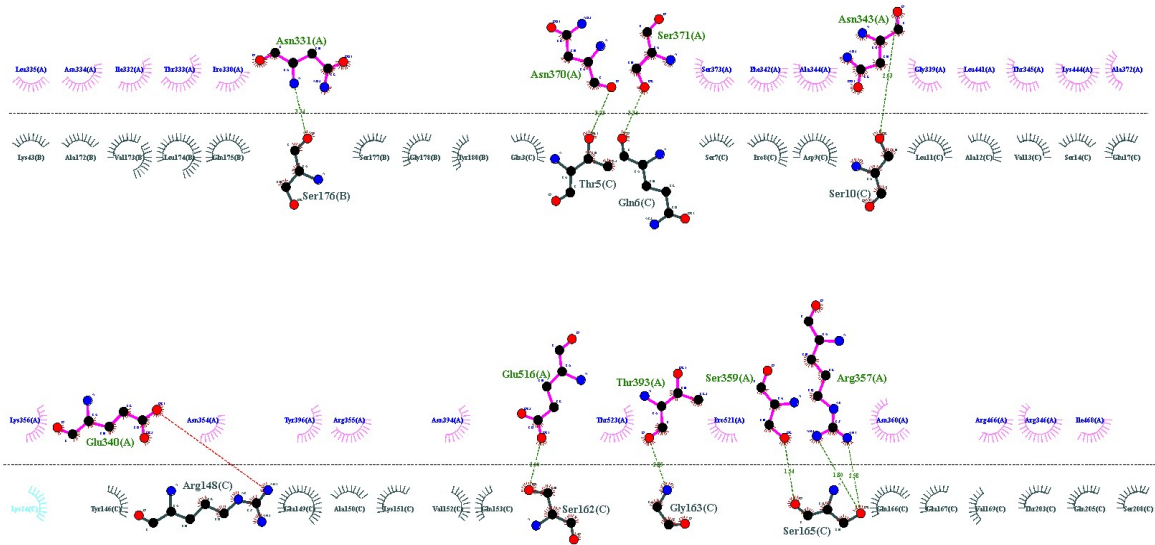

Loop L1

Q493N

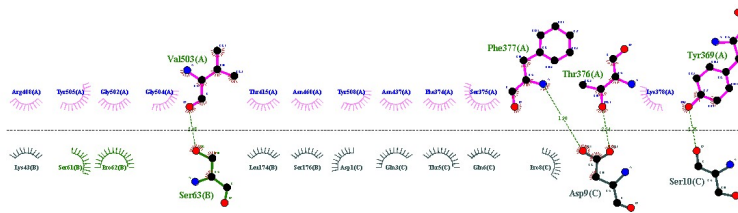

Loop H2

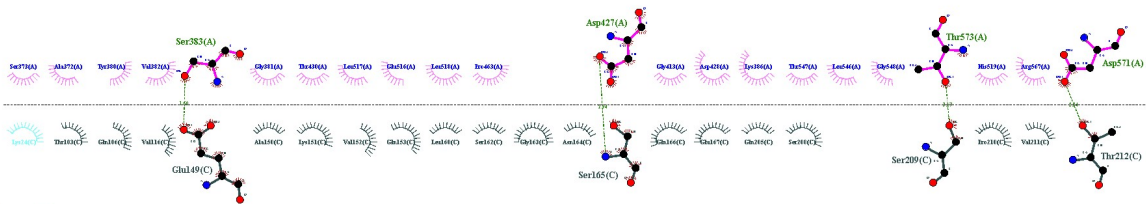

Loop L1

Double mutant

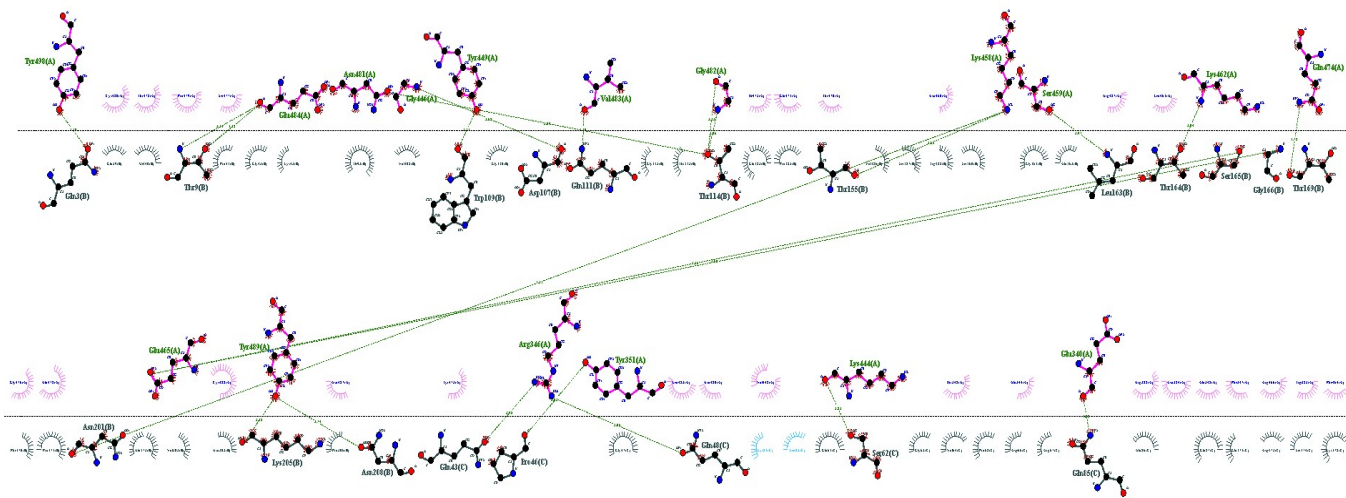

Loop L2

Q498Y

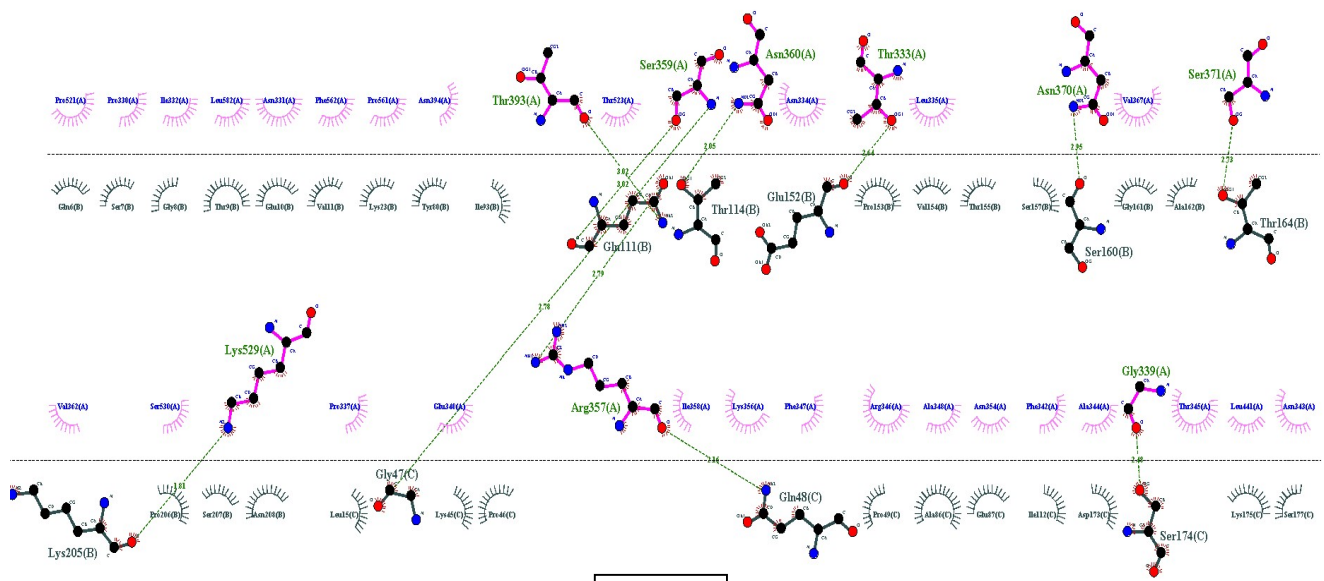

R408I



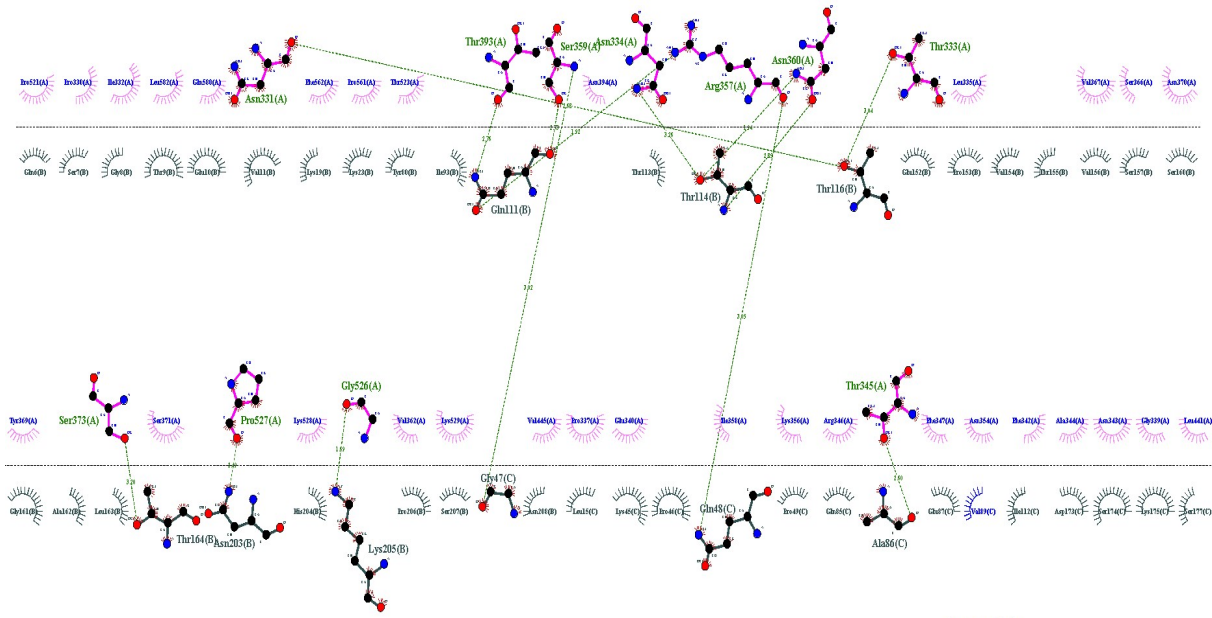

E484K

Loop L3

## ACE2 – RBD Variants

Molecular interaction of ACE2 (6ACG) with 7 different RBD Variants which have structural changes in RBD region. Hydrogen bonds showed in green dashed lines and hydrophobic contacts indicated by the red brick

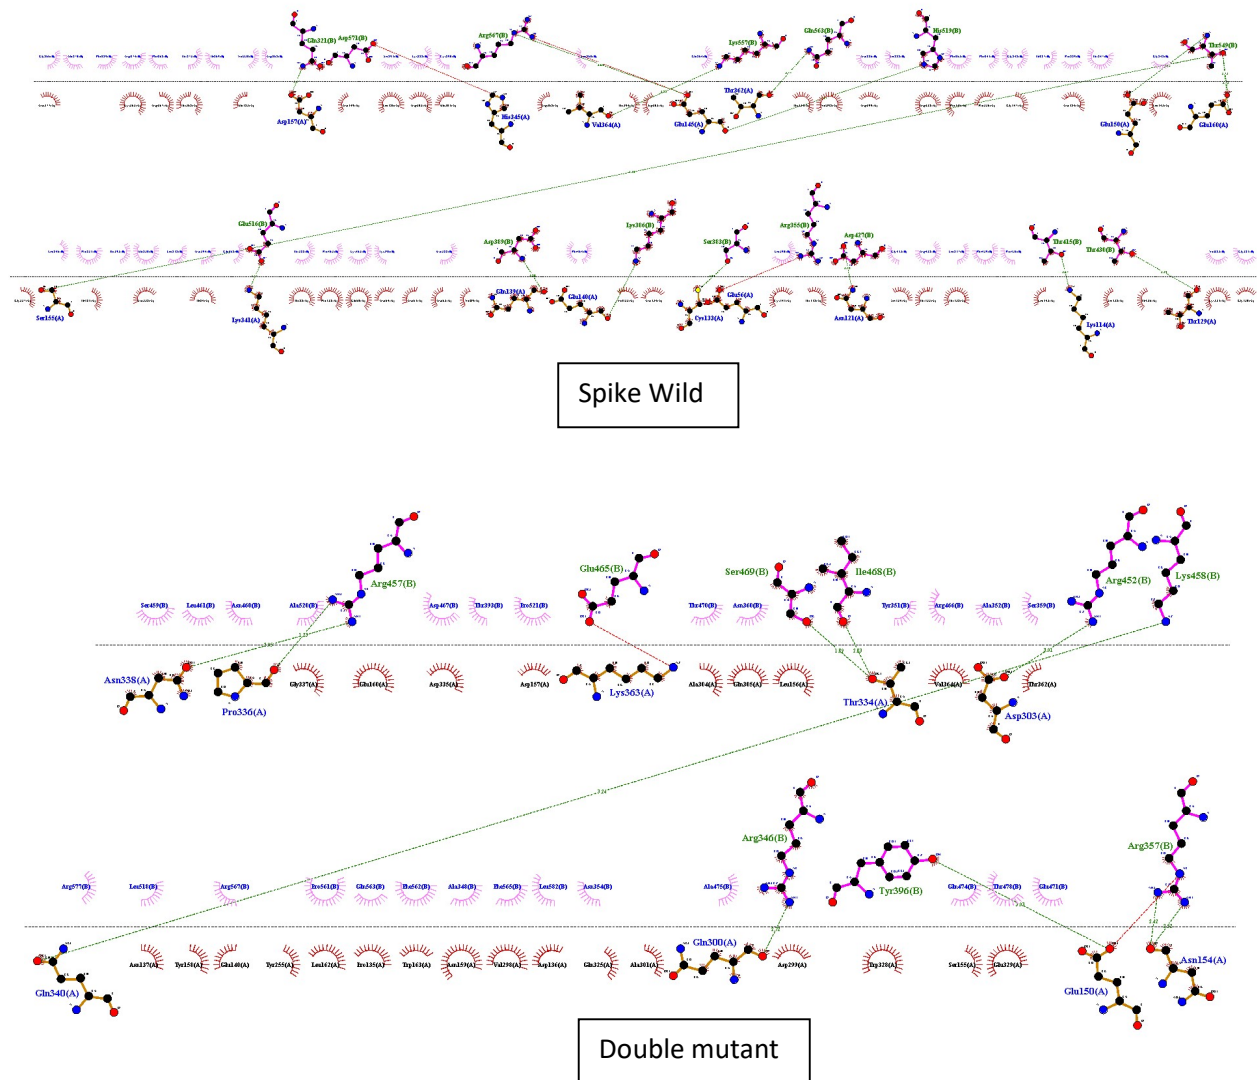

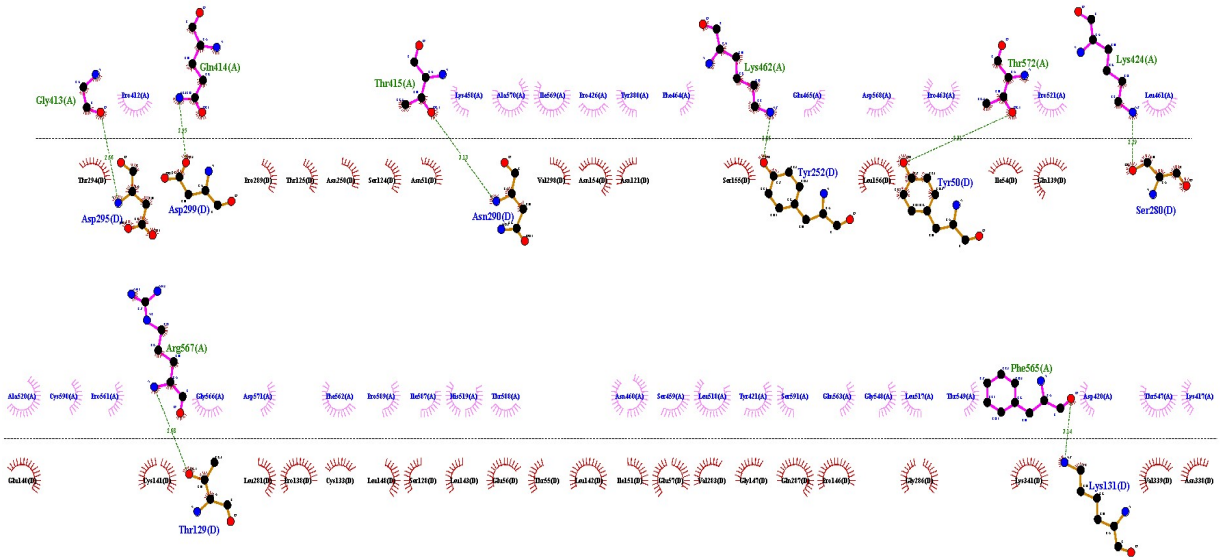

E484k

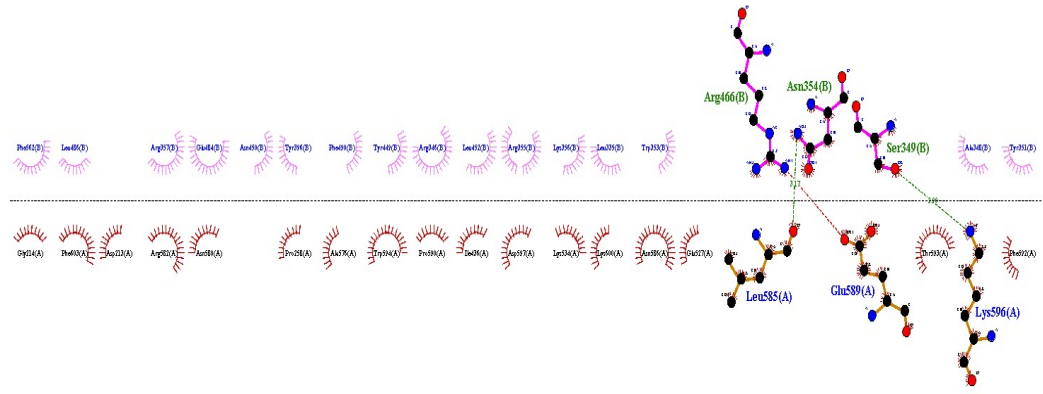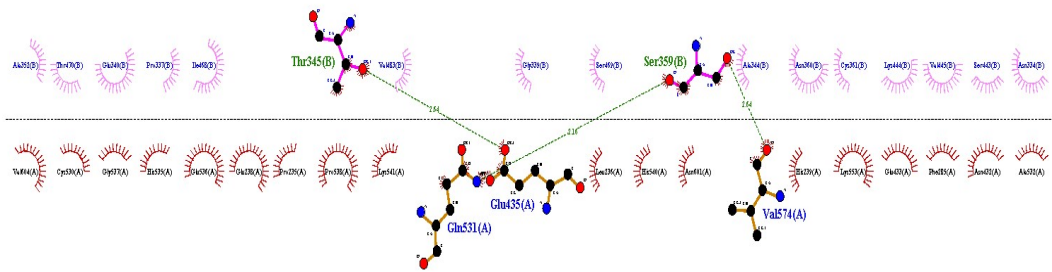

F486L

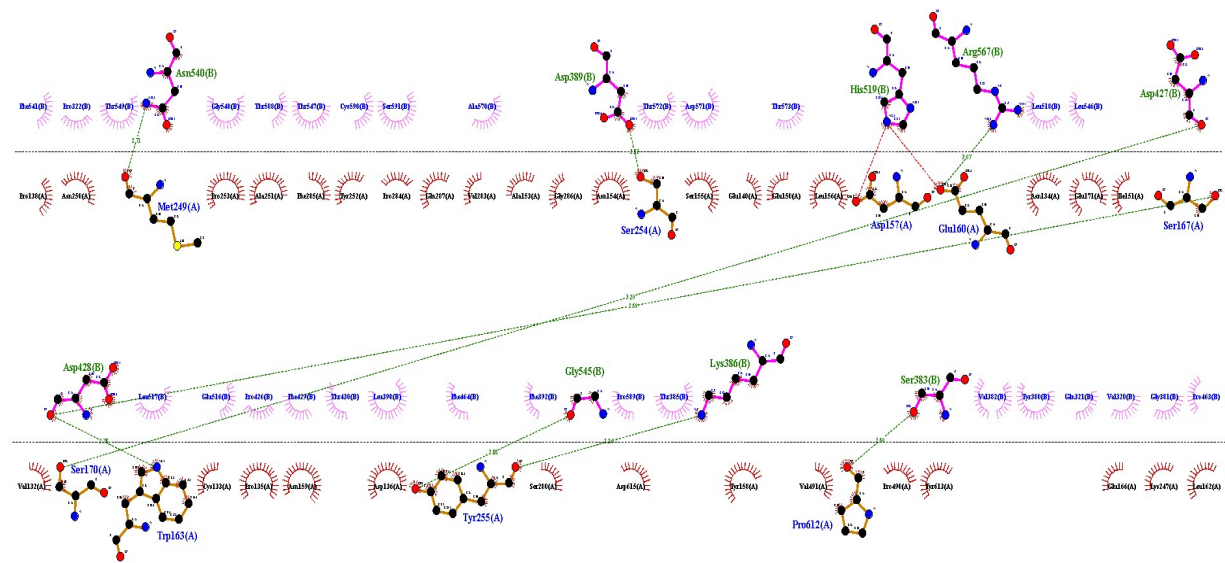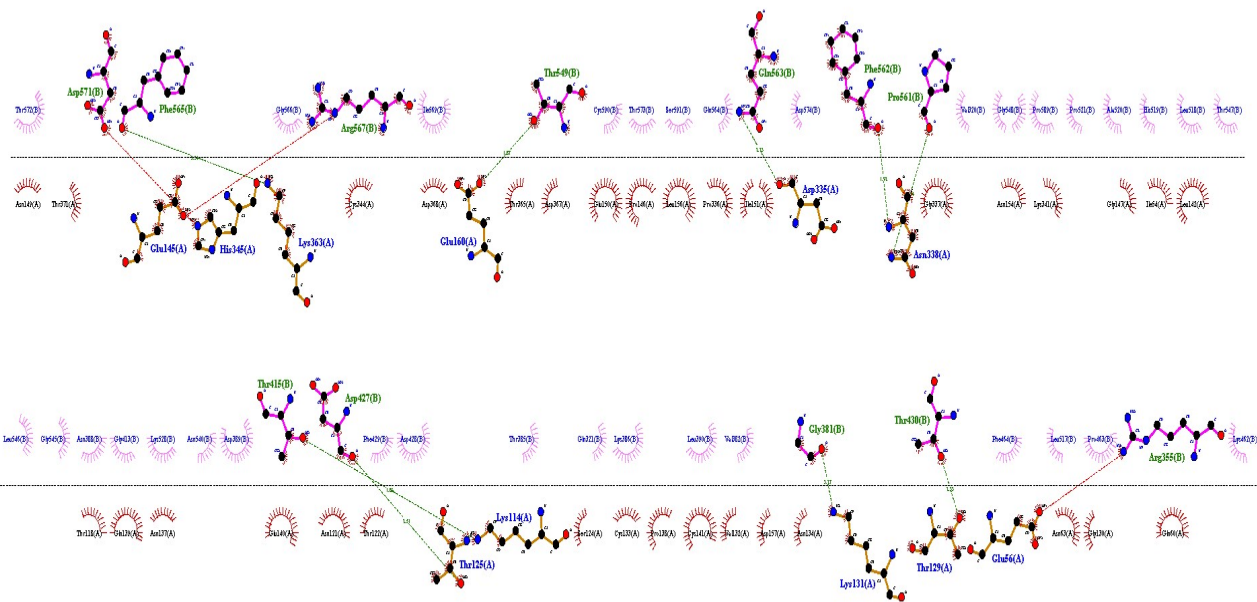



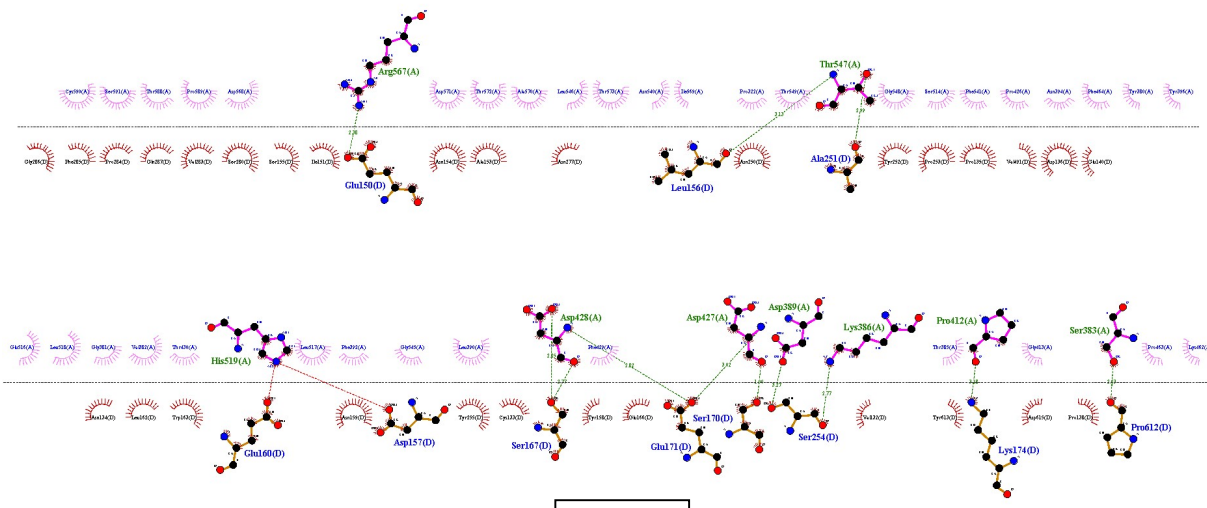

Q493N

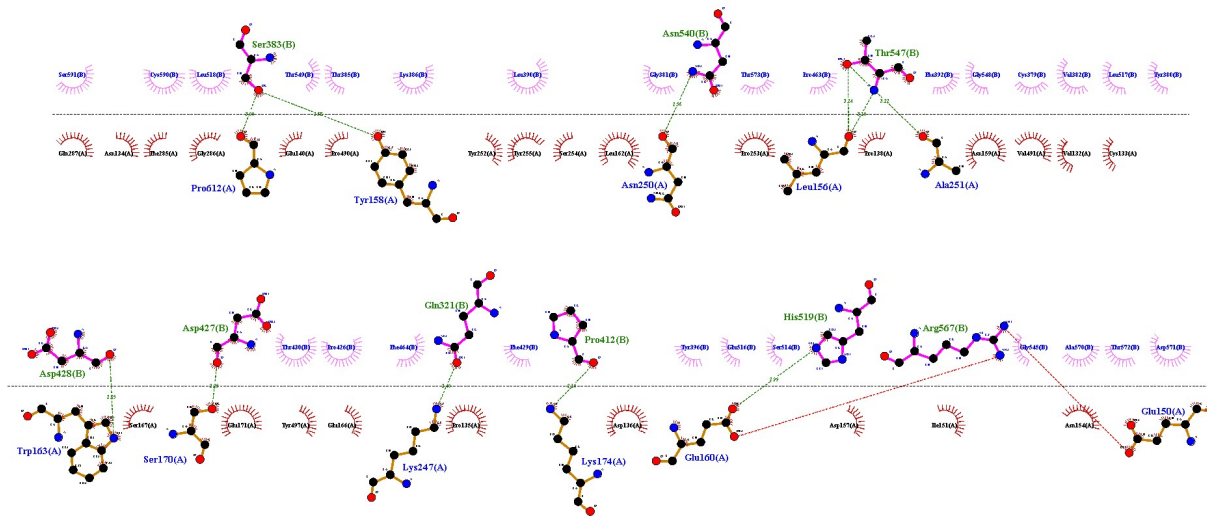

R408I
